# Supplementary material
Source: PubMed Central journal article supplement (PMC4794012)

## Appendix 3 Forest plots for secondary outcomes using Peto Odds Ratios and Risk Differences using fixed effect Mantel-Haenszel method [posted as supplied by author]

### Aggression Peto OR

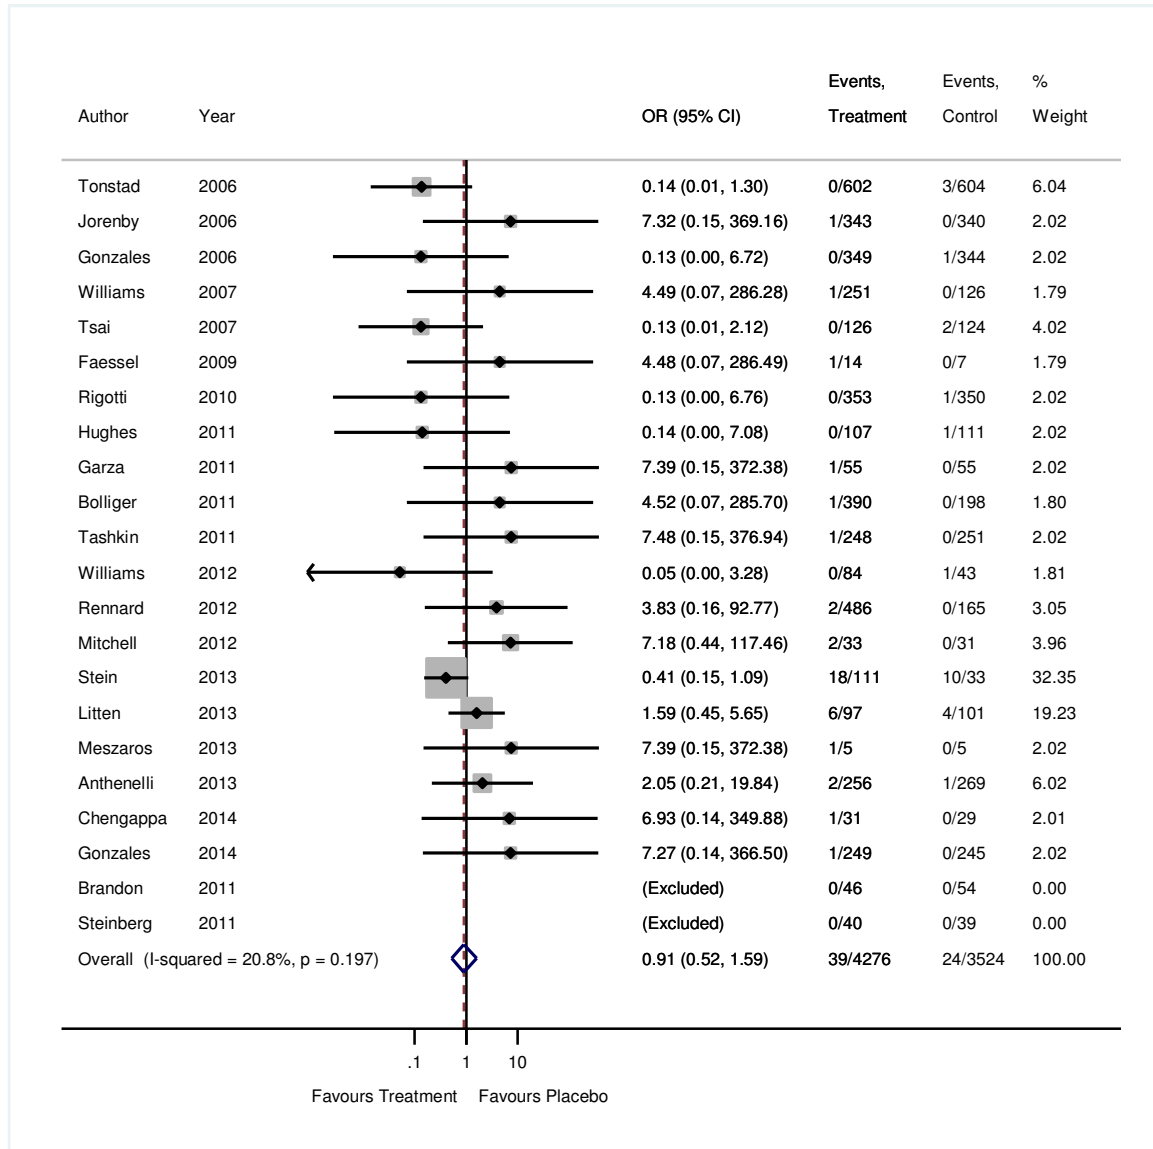

## Aggression RD

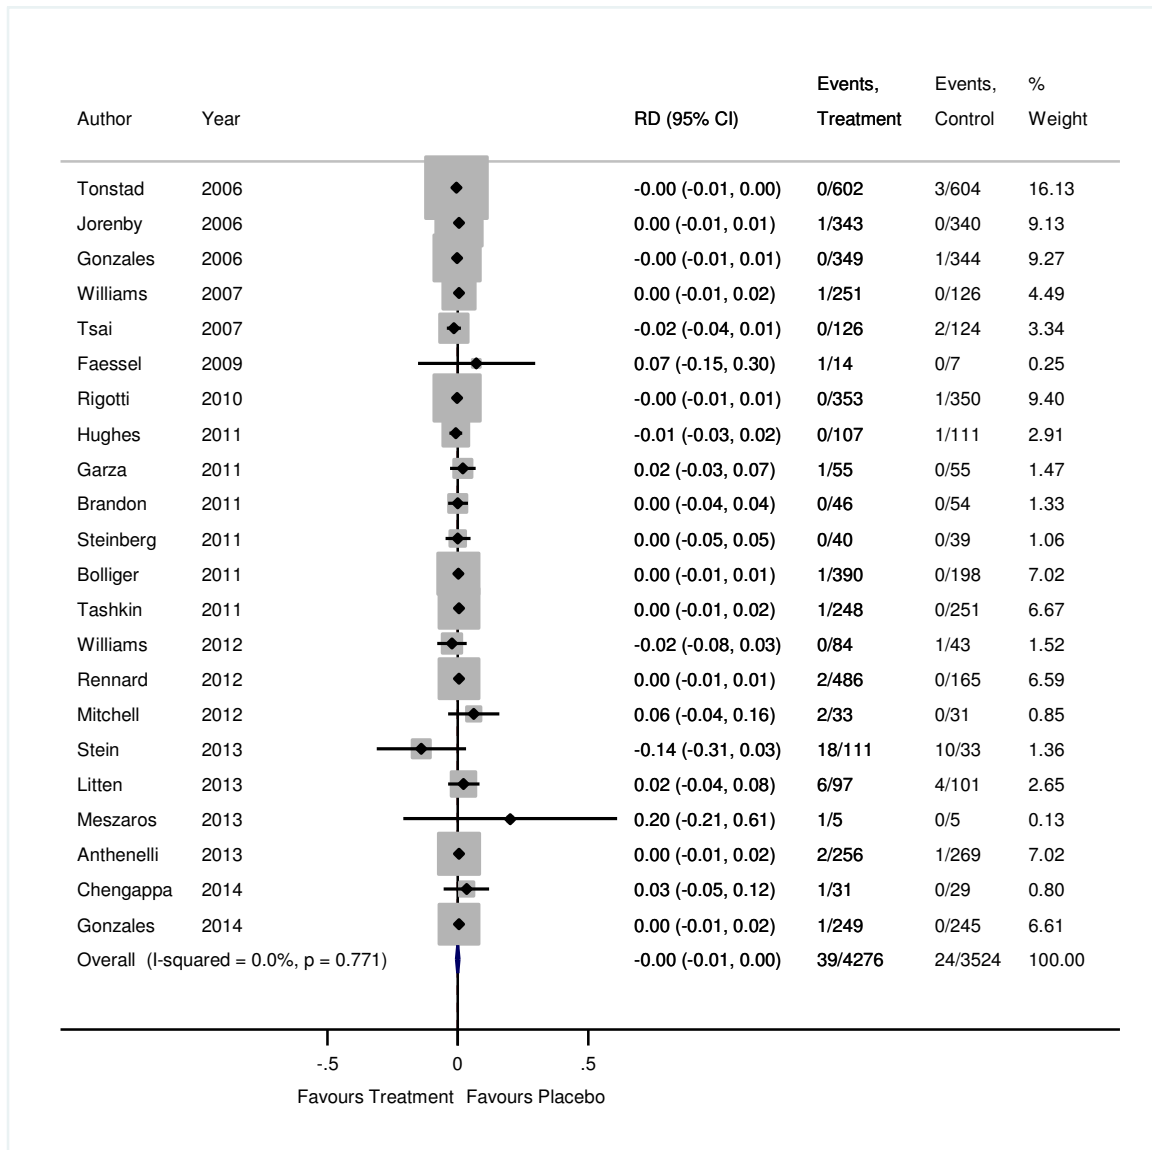

# Insomnia Peto OR

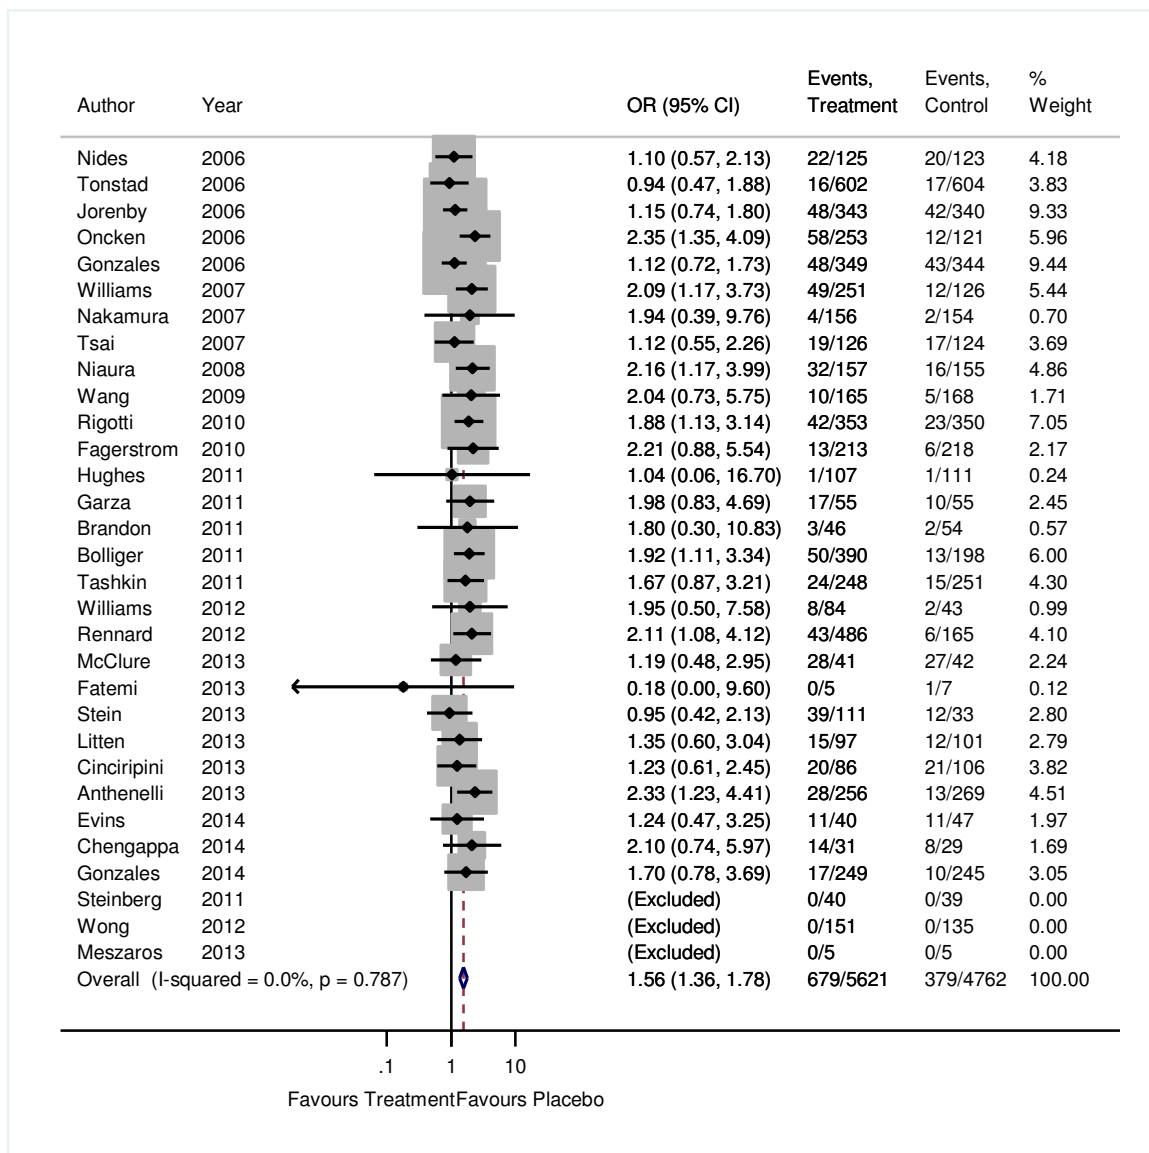

# Insomnia RD

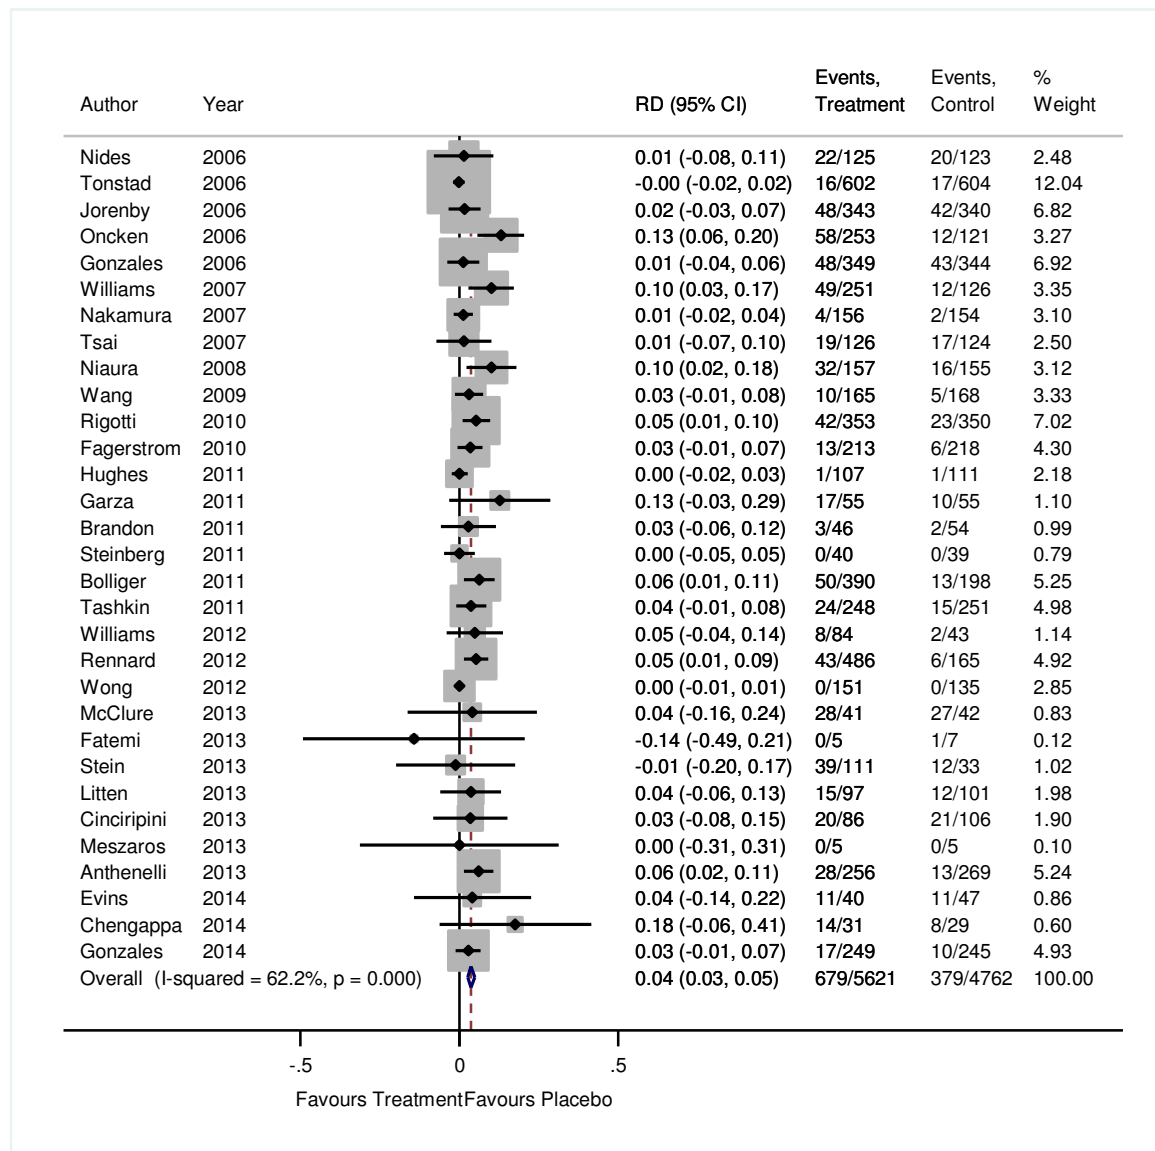

# Anxiety Peto OR

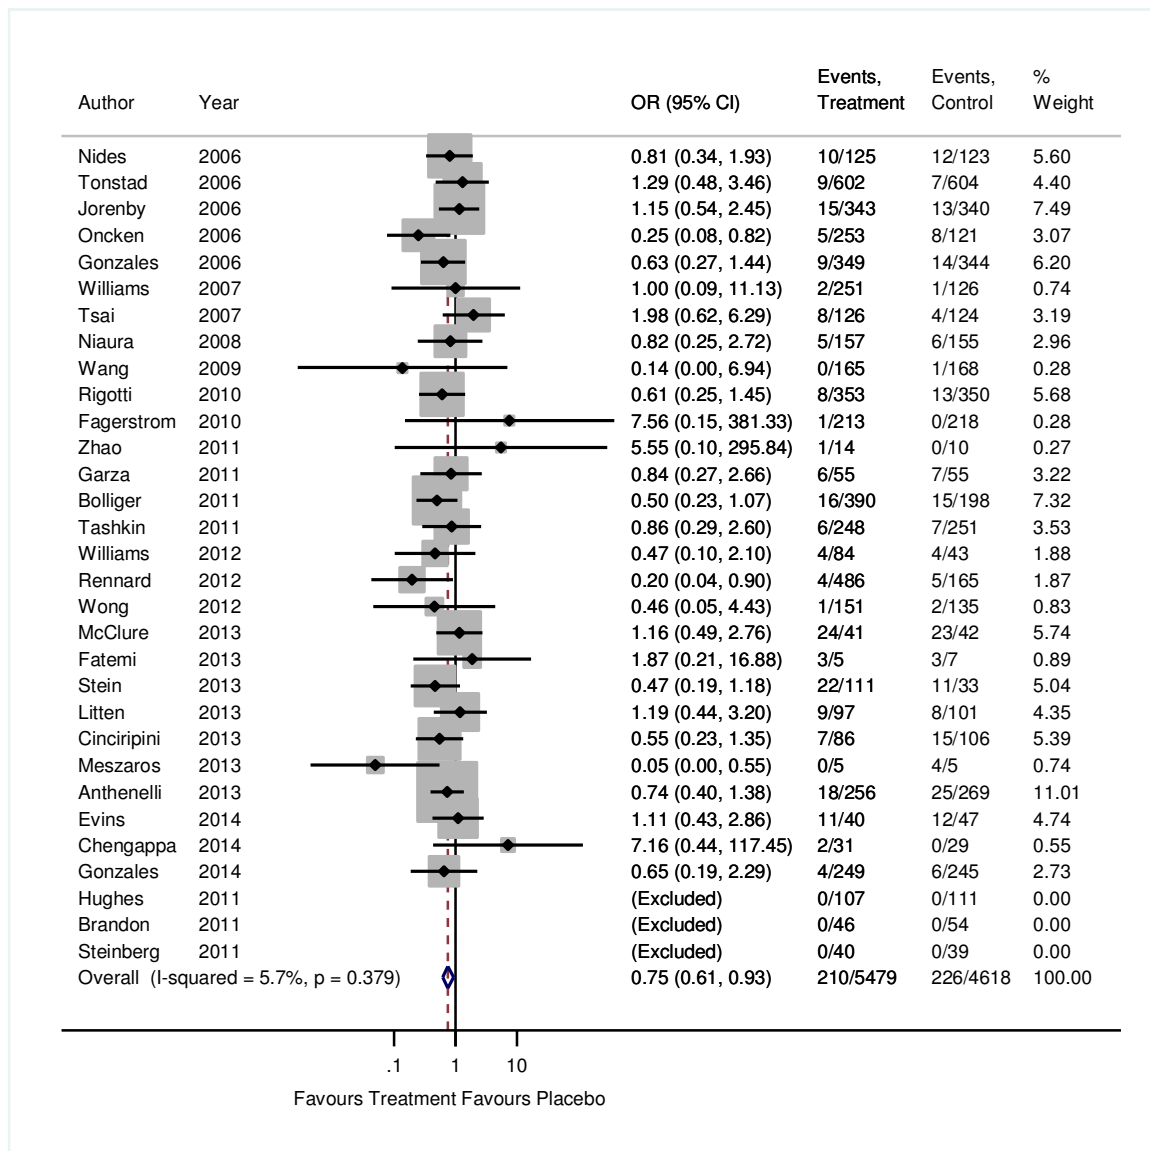

# Anxiety RD

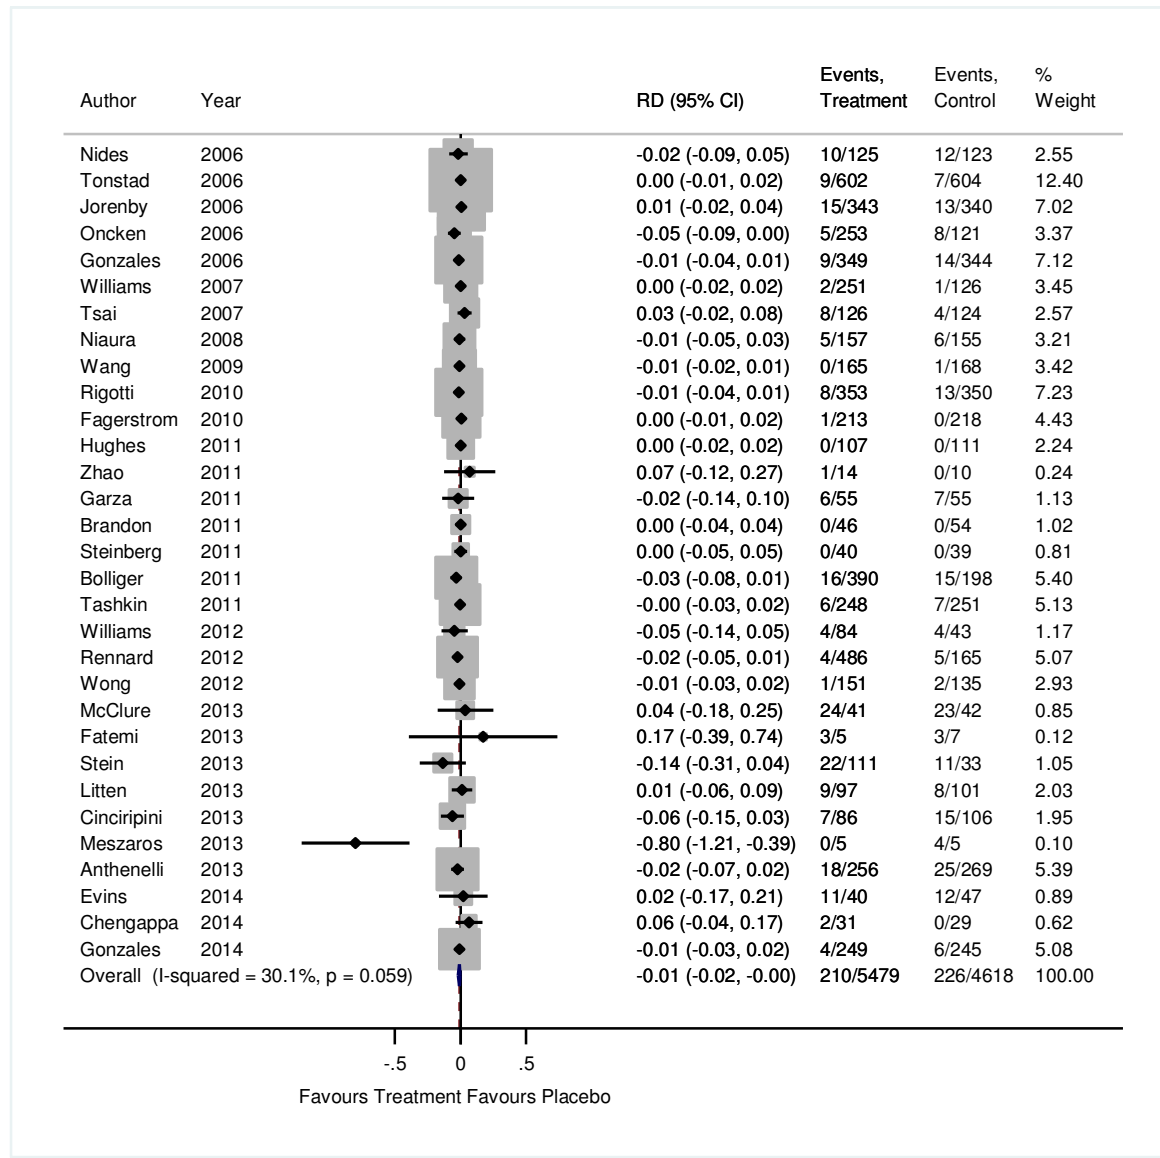

# Somnolence Peto OR

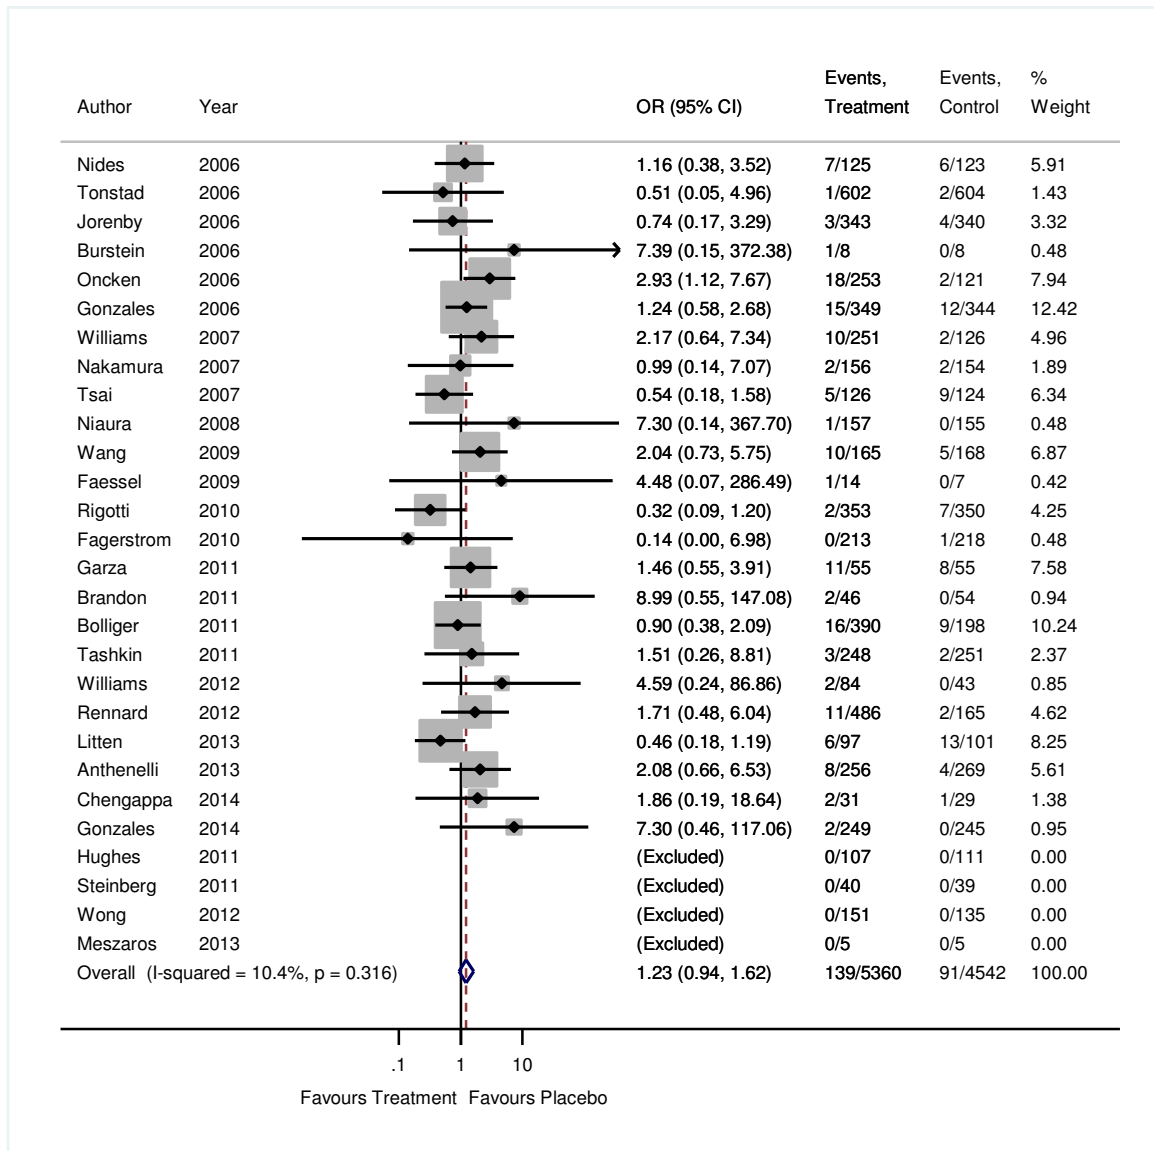

# Somnolence RD

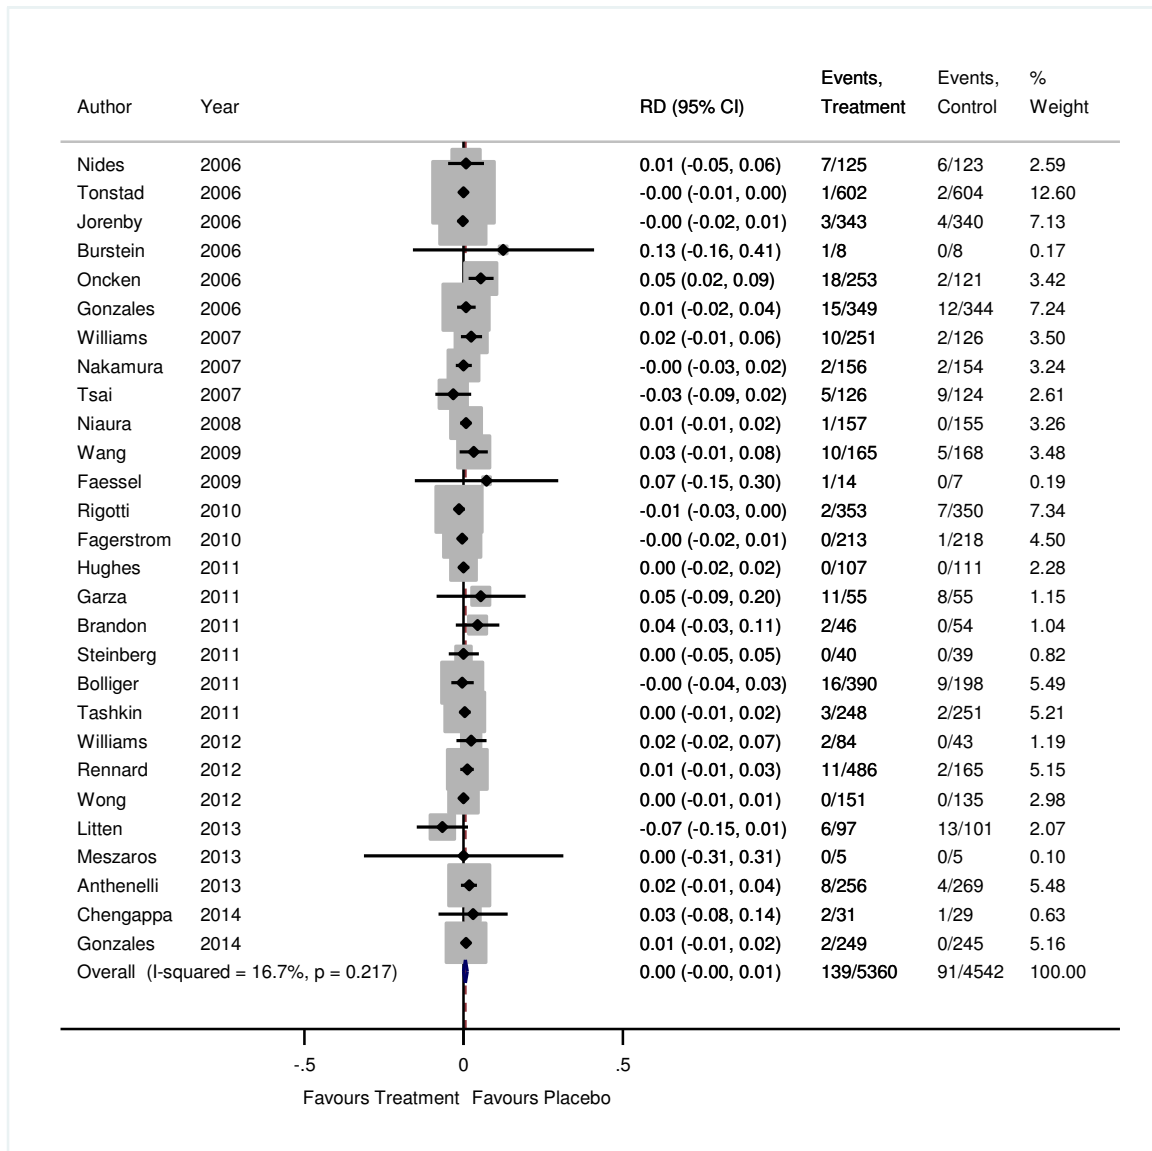



# Irritability Peto OR

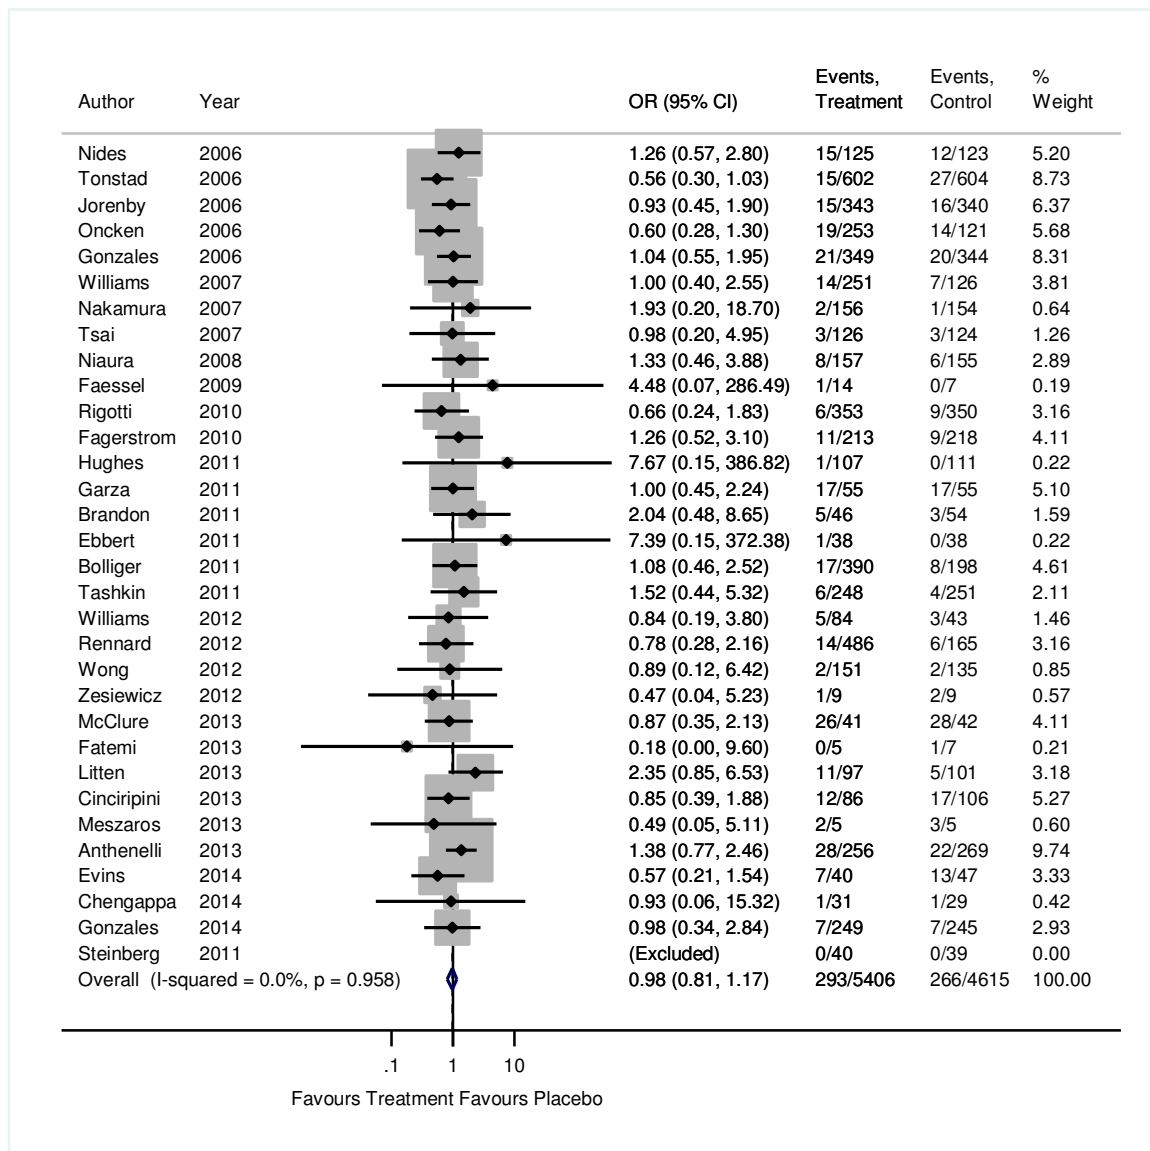

# Irritability RD

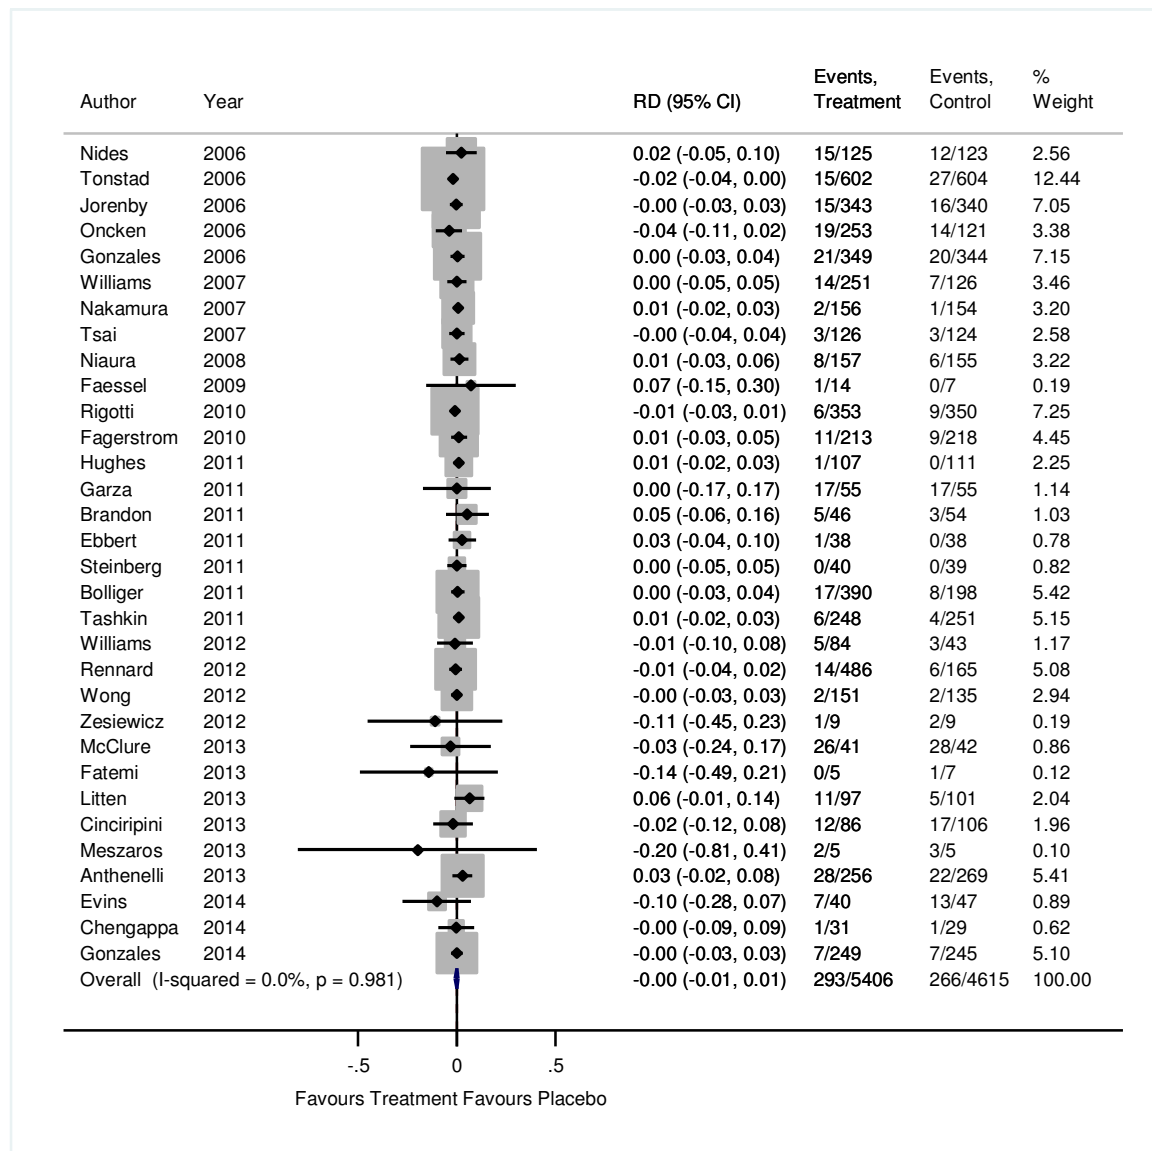

# Sleep Disorders Peto OR

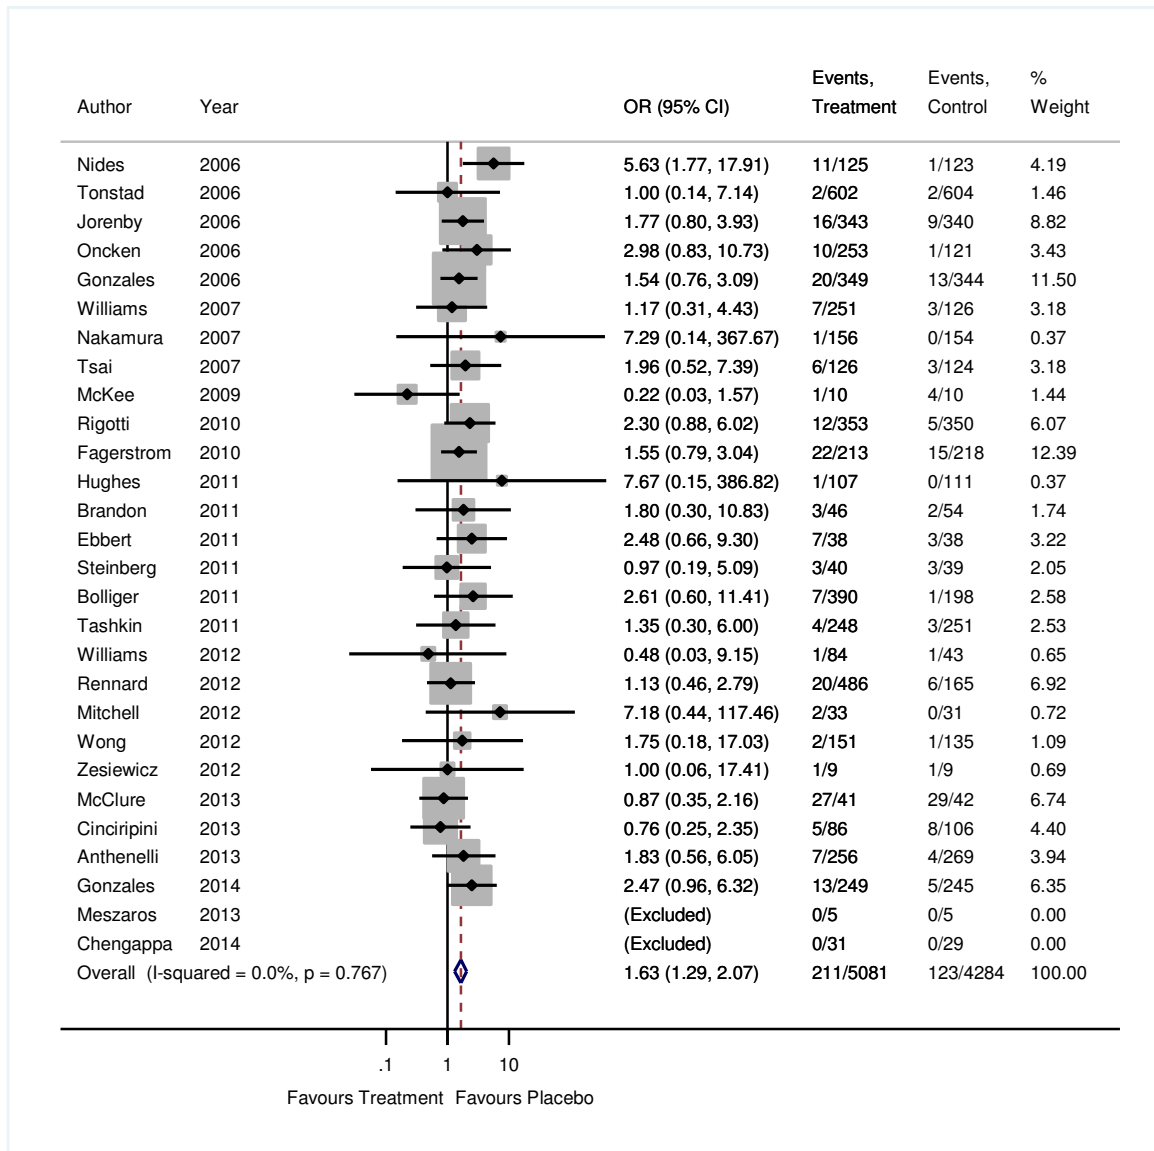

# Sleep Disorders RD

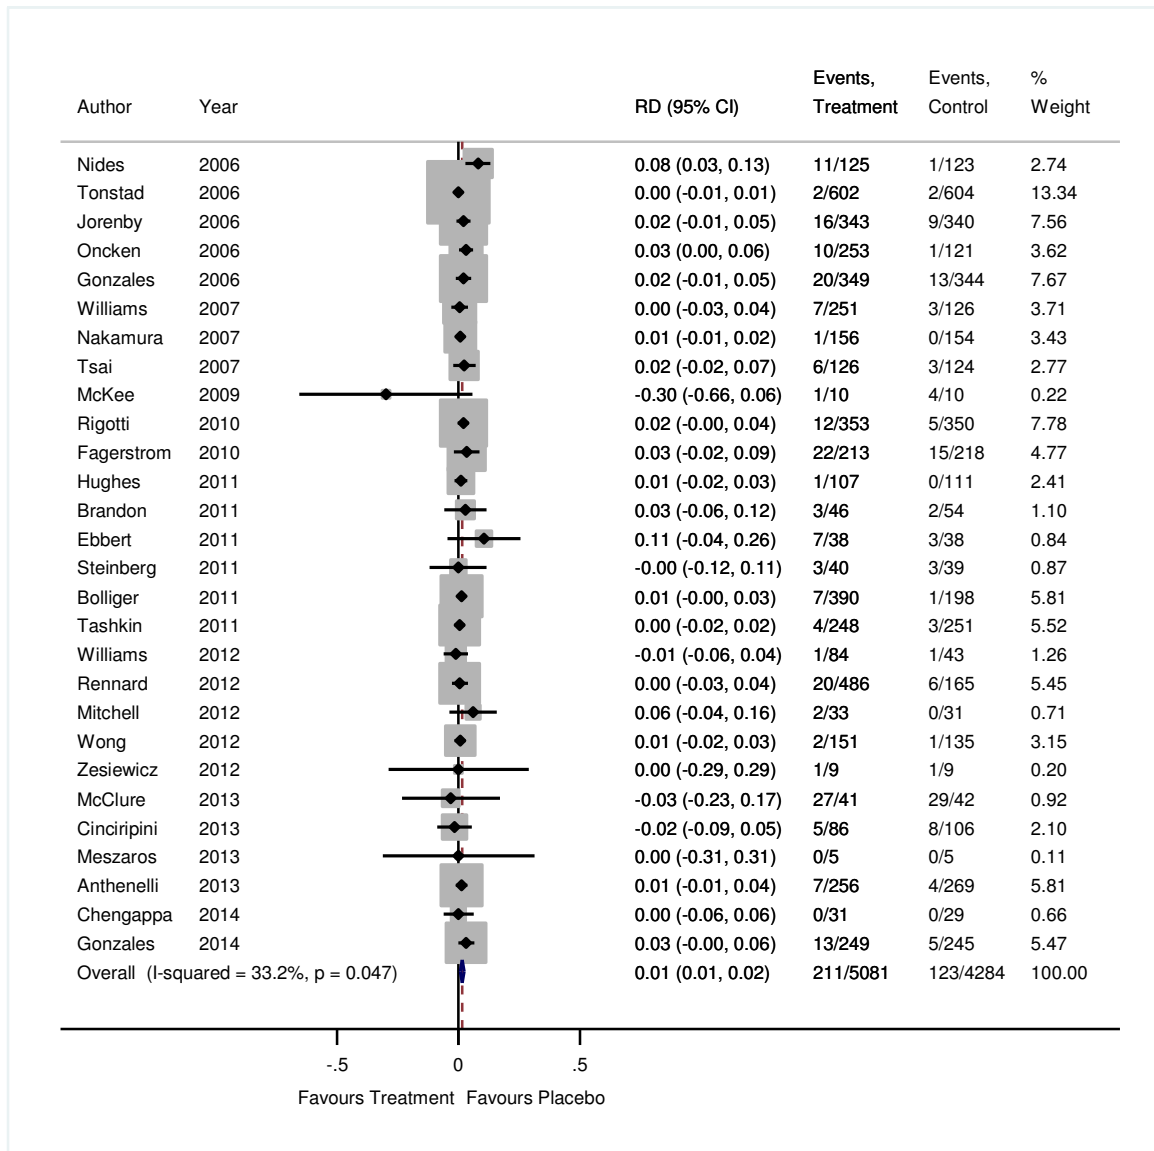

# Abnormal Dreams Peto OR

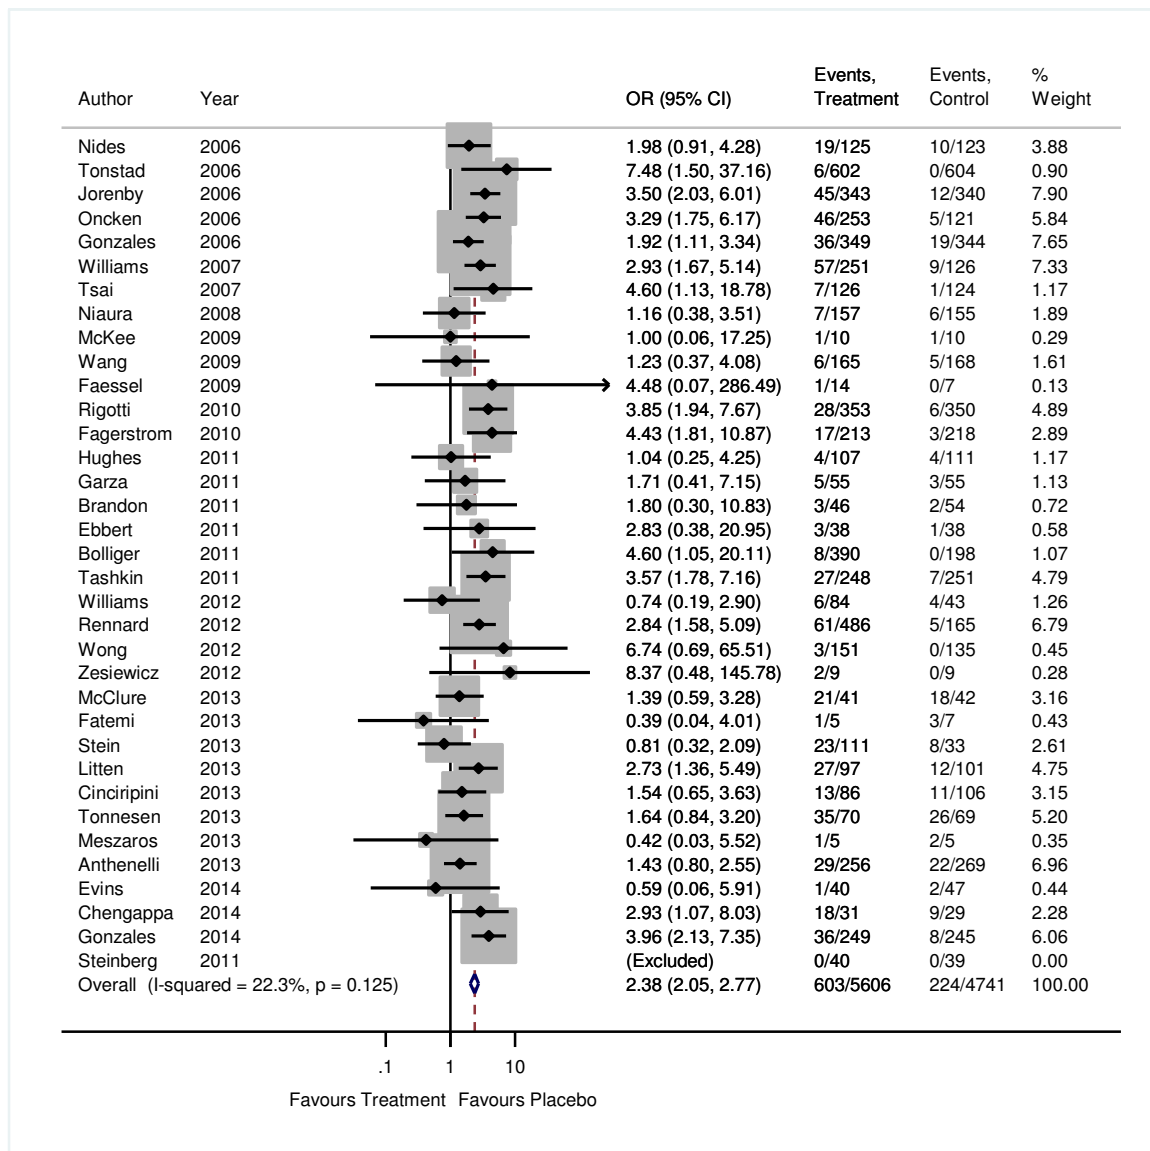

# Abnormal dreams RD

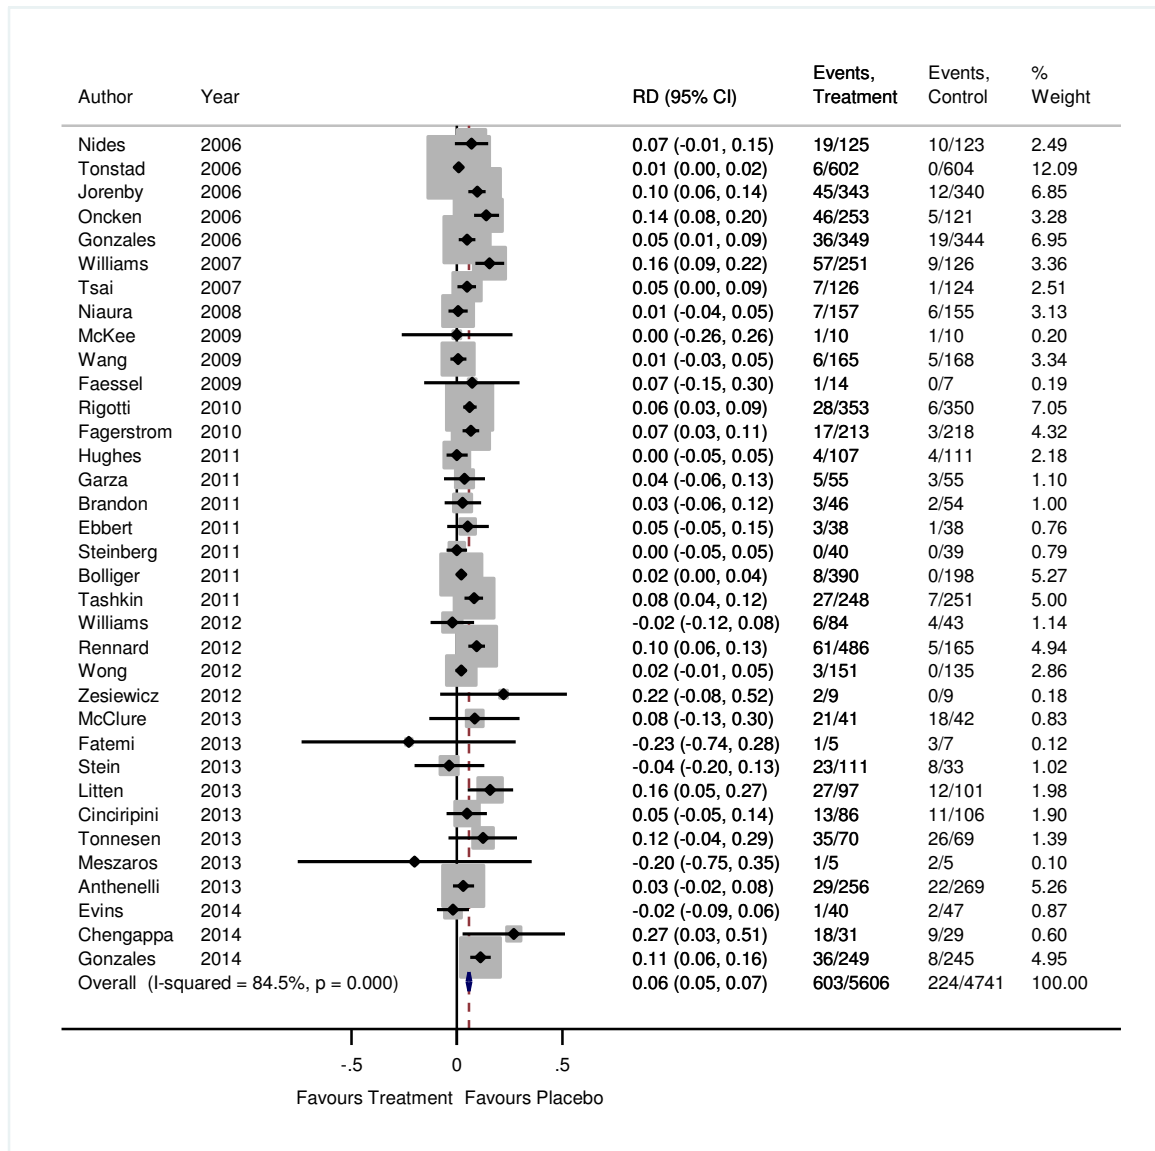

## Fatigue Peto OR

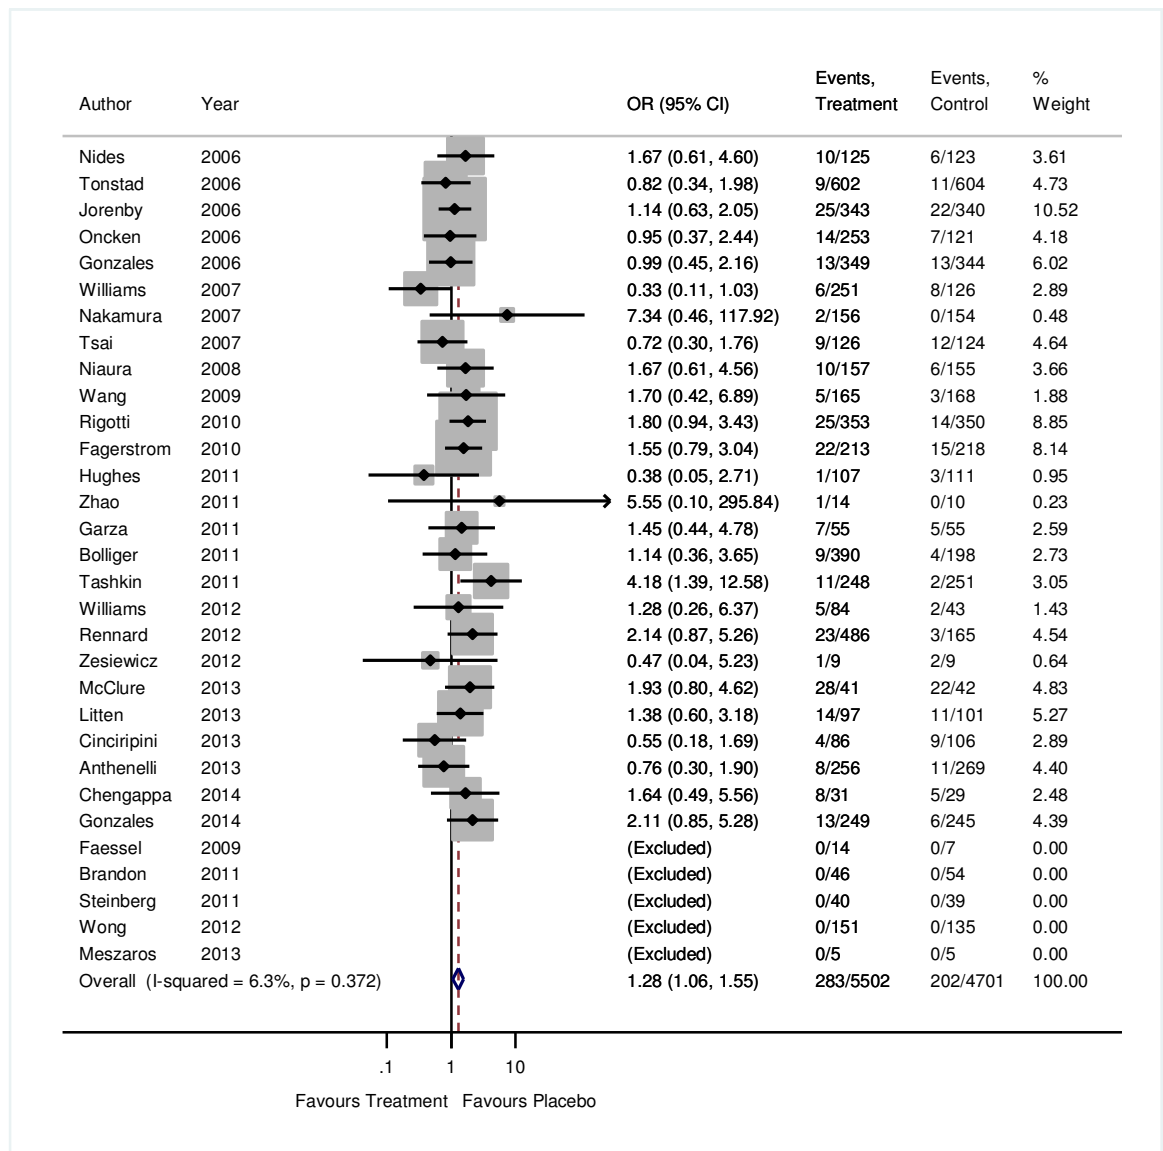

## Fatigue RD

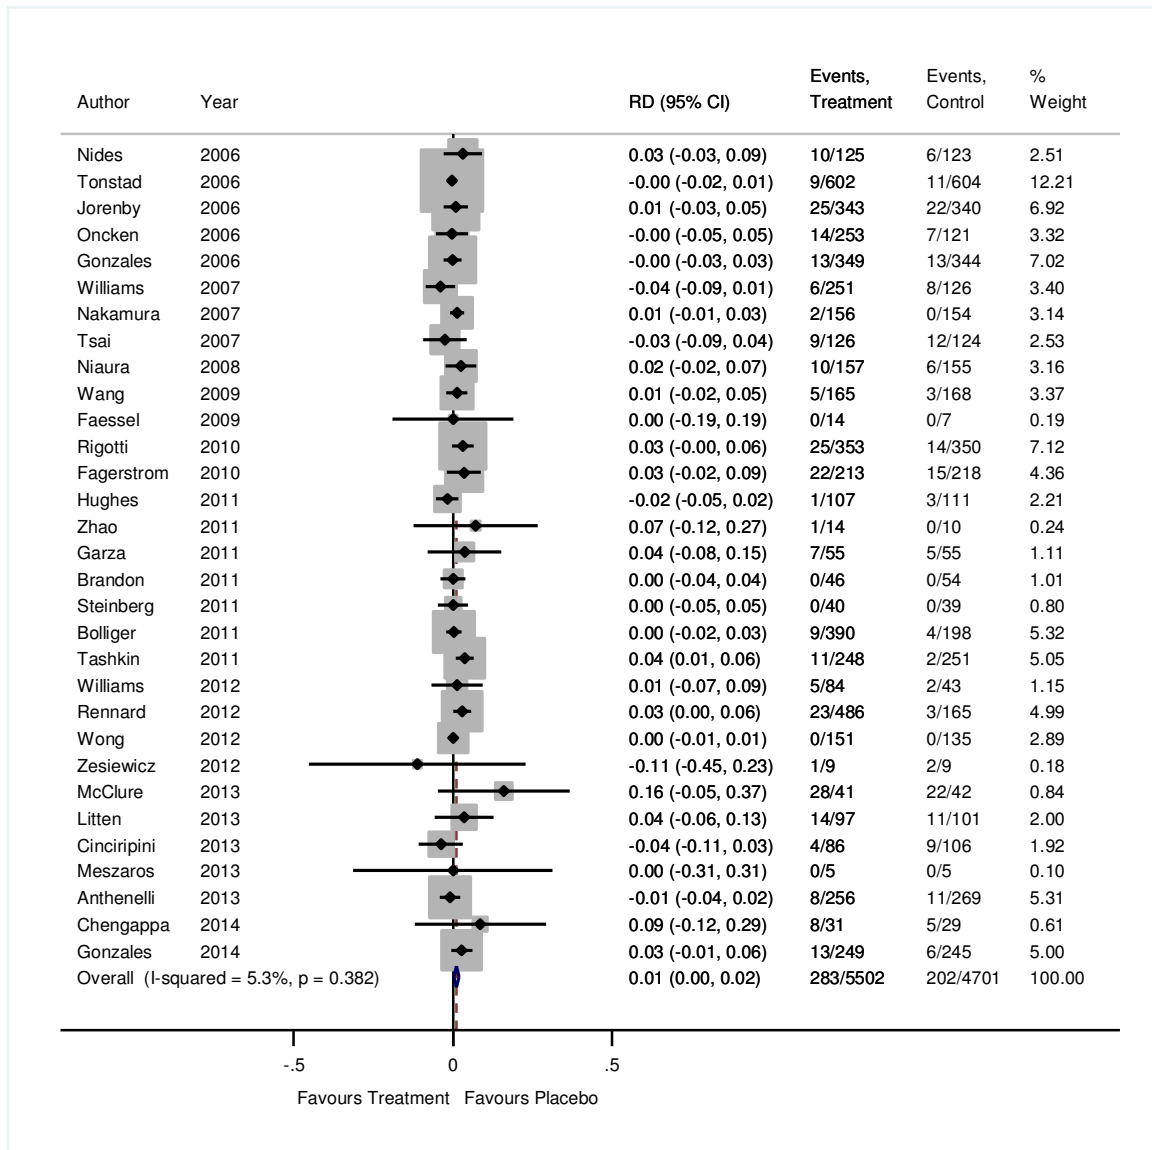



# Death Peto OR

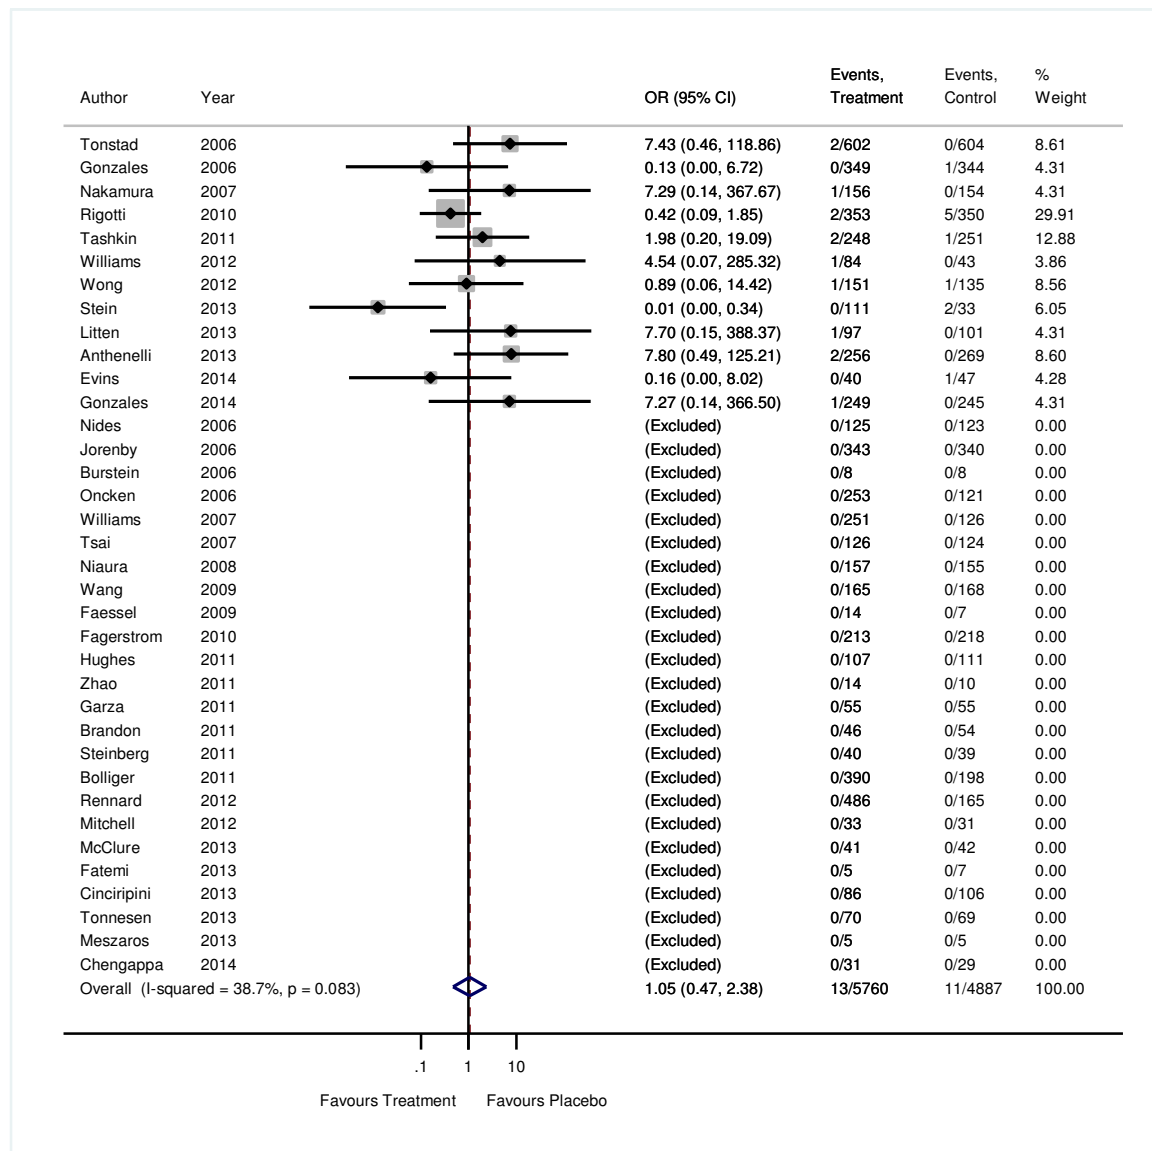

# Death RD

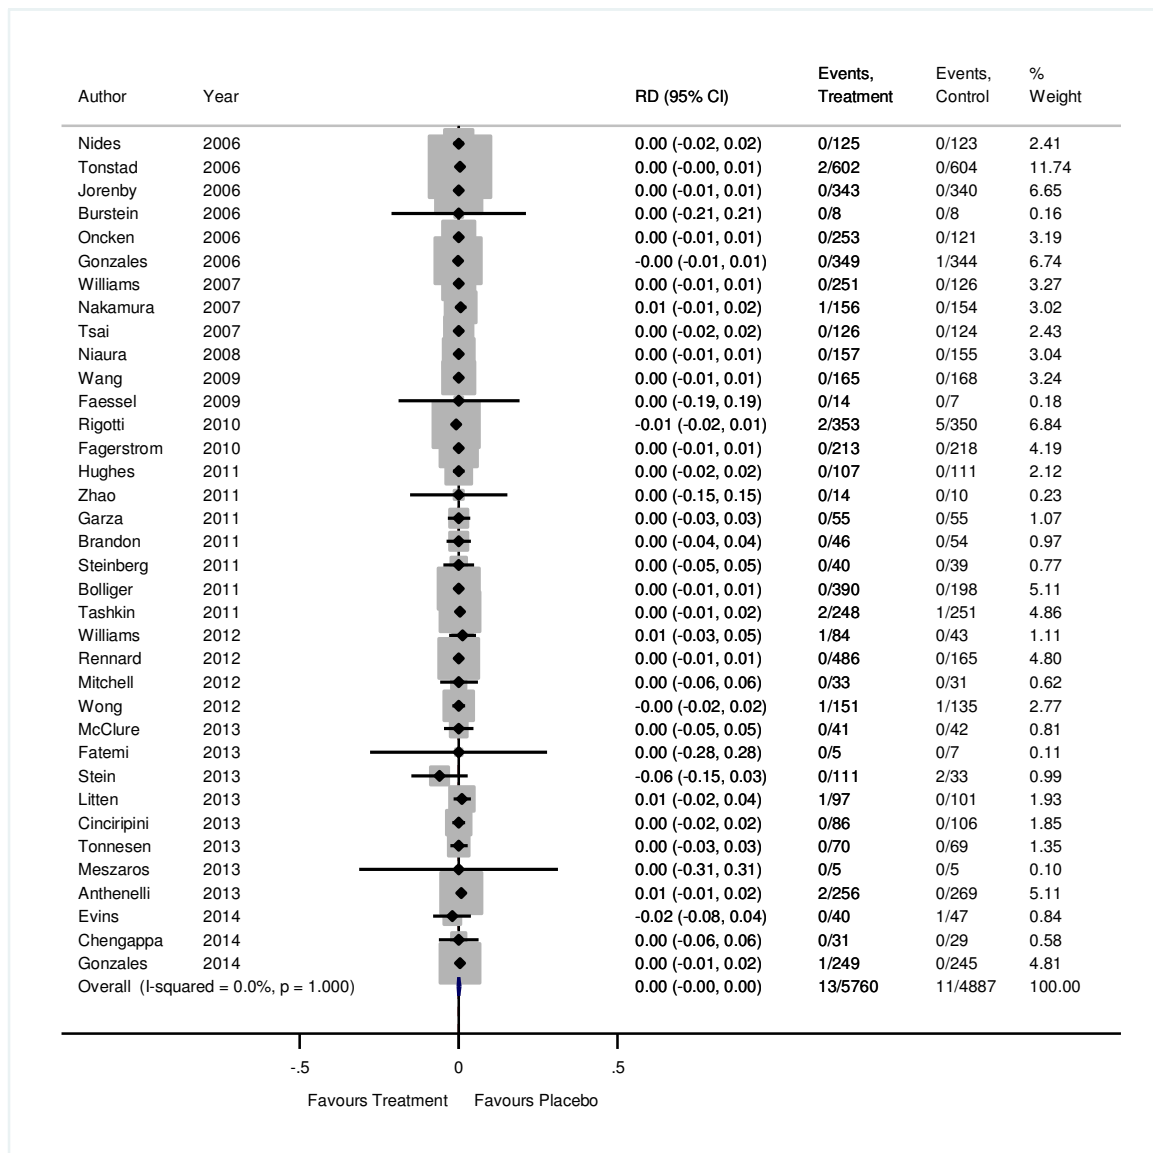

# Suicide and suicide attempt combined

## Peto OR

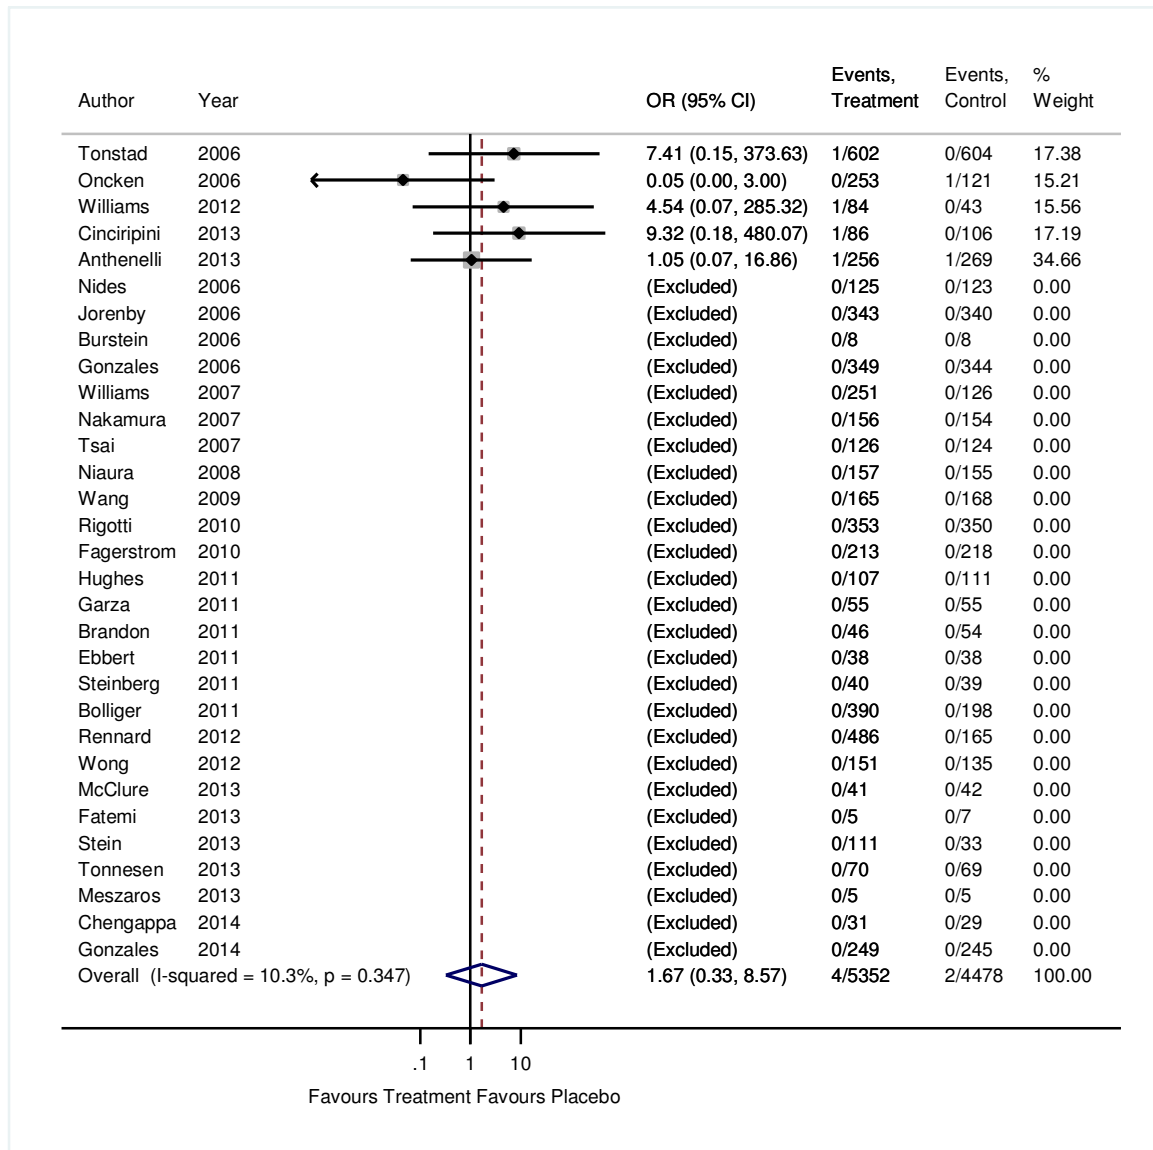

# Suicide and suicide attempt combined

## Risk difference

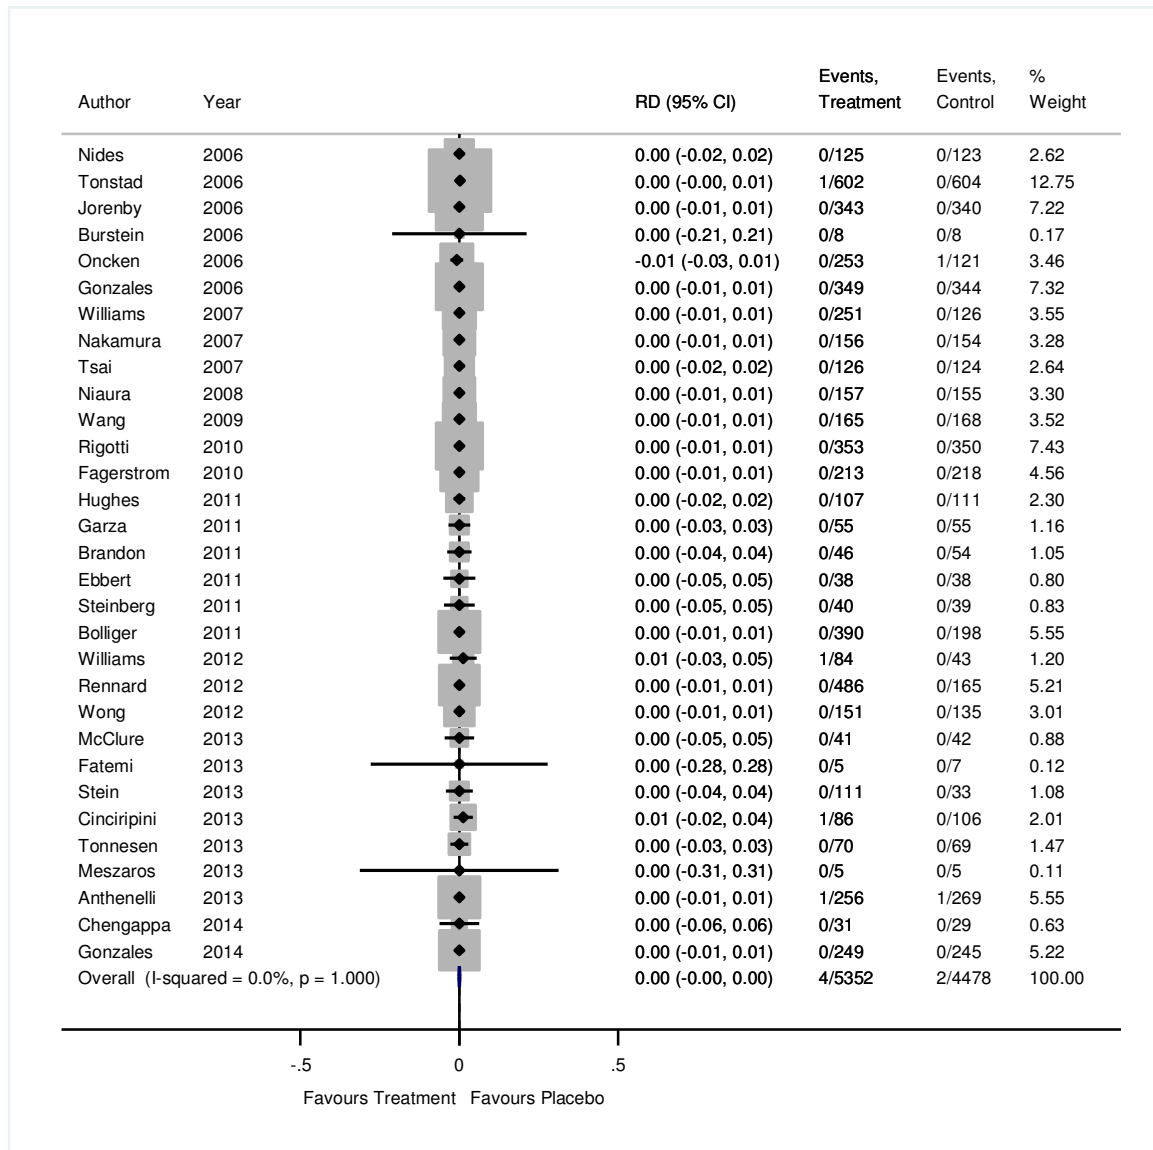

Supplement: thok023212.ww3_default.pdf [file thok023212.ww3_default.pdf]
