# Supplementary material
Source: PubMed Central journal article supplement (PMC4794012)
Supplement: thok023212.ww2_default.pdf [file thok023212.ww2_default.pdf]

Appendix 2 Further characteristics of randomised controlled trials of varenicline 1mg twice daily vs placebo included in the systematic review [posted as supplied by author]

| First author | Year of publication | Location                                                                                              | Population                                                                                         | % smokers                           | Sponsored by pharmaceutical company | Loss to follow up varenicline % | Loss to follow up placebo % |
|--------------|---------------------|-------------------------------------------------------------------------------------------------------|----------------------------------------------------------------------------------------------------|-------------------------------------|-------------------------------------|---------------------------------|-----------------------------|
| Anthenelli   | 2013                | Bosnia and Herzegovina, Croatia, Germany, Hungary, Romania, Russian Federation, Spain, USA            | smokers with stably treated current or past major depression and no recent cardiovascular disease  | 100                                 | yes                                 | 4.7                             | 4.8                         |
| Bolliger     | 2011                | Brazil, Venezuela, Mexico, Colombia, Costa Rica, S Africa, Egypt, UAE, Lebanon, Saudi Arabia, Lebanon | smokers from general population                                                                    | 100                                 | yes                                 | 3.6                             | 3                           |
| Brandon      | 2011                | USA                                                                                                   | smokers from general population                                                                    | 100                                 | no                                  | 17.9                            | 7.4                         |
| Burstein     | 2006                | USA                                                                                                   | smokers from general population                                                                    | 100                                 | yes                                 | 0                               | 0                           |
| Chengappa    | 2014                | USA                                                                                                   | smokers with bipolar disorder                                                                      | 100                                 | no                                  | 6.5                             | 6.9                         |
| Cinciripini  | 2013                | USA                                                                                                   | smokers from general population                                                                    | 100                                 | no                                  | 24.4                            | 28.3                        |
| Ebbert       | 2011                | USA                                                                                                   | people who use smokeless tobacco                                                                   | 100<br>(smokeless)<br>4 (cigarette) | no                                  | 7.9                             | 2.6                         |
| Evins        | 2014                | USA                                                                                                   | smokers with schizophrenia, schizoaffective disorder or bipolar disorder                           | 100                                 | no                                  | 7.5                             | 10.6                        |
| Faessel      | 2009                | USA and UK                                                                                            | Adolescent smokers                                                                                 | 100                                 | yes                                 | 0                               | 0                           |
| Fagerstrom   | 2010                | Norway, Sweden                                                                                        | users of smokeless tobacco from primary care clinics and those attending smoking cessation clinics | 100<br>(smokeless)<br>0 (cigarette) | yes                                 | 4.2                             | 2.8                         |
| Fatemi       | 2013                | USA                                                                                                   | smokers with schizophrenia or schizoaffective disorder                                             | 100                                 | no                                  | NA                              | NA                          |
| Garza        | 2011                | USA                                                                                                   | smokers from general population                                                                    | 100                                 | yes                                 | 1.8                             | 0                           |
| Gonzales     | 2006                | USA                                                                                                   | smokers from general                                                                               | 100                                 | yes                                 | 21.9                            | 20.6                        |

| First author | Year of publication | Location                                                             | Population                                                                                                         | % smokers | Sponsored by pharmaceutical company | Loss to follow up varenicline % | Loss to follow up placebo % |
|--------------|---------------------|----------------------------------------------------------------------|--------------------------------------------------------------------------------------------------------------------|-----------|-------------------------------------|---------------------------------|-----------------------------|
| Gonzales     | 2014                | Australia, Belgium, Canada, Czech Republic, France, Germany, UK, USA | population smokers hoping to quit who had been previously treated with varenicline                                 | 100       | yes                                 | 13.7                            | 12.2                        |
| Hughes       | 2011                | USA                                                                  | smokers from the general population who were not quite ready to quit                                               | 100       | no                                  | 28                              | 31.5                        |
| Jorenby      | 2006                | USA                                                                  | smokers from general population                                                                                    | 100       | yes                                 | 13.7                            | 16.1                        |
| Litten       | 2013                | USA                                                                  | people with DSM IV TR alcohol dependence                                                                           | 39        | no                                  | 2                               | 5.9                         |
| McClure      | 2013                | USA                                                                  | smokers from general population                                                                                    | 100       | no                                  | 53.7                            | 56                          |
| McKee        | 2009                | USA                                                                  | heavy drinking smokers                                                                                             | 100       | no                                  | NA                              | NA                          |
| Meszaros     | 2013                | USA                                                                  | schizophrenic patients and patients with schizoaffective disorder and co-occurring nicotine and alcohol dependence | 100       | no                                  | 60                              | 60                          |
| Mitchell     | 2012                | USA                                                                  | heavy drinking smokers                                                                                             | 100       | no                                  | 45.2                            | 35.7                        |
| Nakamura     | 2007                | Japan                                                                | smokers from general population                                                                                    | 100       | yes                                 | NA                              | NA                          |
| Niaura       | 2008                | USA                                                                  | smokers from general population                                                                                    | 100       | yes                                 | 27                              | 28                          |
| Nides        | 2006                | USA                                                                  | smokers from general population                                                                                    | 100       | yes                                 | NA                              | NA                          |
| Oncken       | 2006                | USA                                                                  | smokers from general population                                                                                    | 100       | yes                                 | NA                              | NA                          |
| Plebani      | 2012                | USA                                                                  | people dependent on cocaine                                                                                        | NA        | no                                  | NA                              | NA                          |
| Plebani      | 2013                | USA                                                                  | people meeting DSM IV-TR criteria for alcohol dependence and reported drinking at least 12 out of last 30 days     | 42.5      | no                                  | NA                              | NA                          |
| Poling       | 2010                | USA                                                                  | treatment seeking opioid dependent subjects who are smokers                                                        | 100       | no                                  | 8                               | 22                          |

| First author | Year of publication | Location                                                                                                                                        | Population                                                                                                     | % smokers | Sponsored by pharmaceutical company | Loss to follow up varenicline % | Loss to follow up placebo % |
|--------------|---------------------|-------------------------------------------------------------------------------------------------------------------------------------------------|----------------------------------------------------------------------------------------------------------------|-----------|-------------------------------------|---------------------------------|-----------------------------|
| Rennard      | 2012                | Argentina, Brazil, Canada, China, Czech Republic, France, Germany, Hungary, Italy, Mexico, Republic of Korea, Taiwan, UK, USA                   | smokers from research centres, private practice offices and research clinics                                   | 100       | yes                                 | 1.8                             | 6                           |
| Rigotti      | 2010                | Argentina, Australia, Brazil, Canada, Czech Republic, Denmark, France, Germany, Greece, Mexico, Netherlands, Republic of Korea, Taiwan, UK, USA | smokers with stable documented cardiovascular disease                                                          | 100       | yes                                 | 3.9                             | 3.1                         |
| Shim         | 2012                | Korea                                                                                                                                           | smokers and non-smokers with chronic schizophrenia who were clinically stable with less than moderate severity | 50        | no                                  | NA                              | NA                          |
| Stein        | 2013                | USA                                                                                                                                             | methadone maintained opiate dependent smokers                                                                  | 100       | no                                  | 16.1                            | 22.2                        |
| Steinberg    | 2011                | USA                                                                                                                                             | hospitalised smokers                                                                                           | 100       | no                                  | 45                              | 45                          |
| Tashkin      | 2011                | USA, Spain, France, Italy                                                                                                                       | smokers with mild to moderate COPD                                                                             | 100       | yes                                 | 15.6                            | 16.1                        |
| Tonnesen     | 2013                | Denmark                                                                                                                                         | ex-smokers who reported >11 months abstinence from smoking and on long term NRT                                | 0         | no                                  | 2.9                             | 4.4                         |
| Tonstad      | 2006                | Canada, Czech Republic, Denmark, Norway, Swede, USA, UK                                                                                         | smokers from medical clinics                                                                                   | 100       | yes                                 | 6.6                             | 9.1                         |
| Tsai         | 2007                | Korea, Taiwan                                                                                                                                   | smokers from general population                                                                                | 100       | yes                                 | 1.6                             | 0.8                         |
| Wang         | 2009                | Thailand, China, Singapore                                                                                                                      | smokers from general population                                                                                | 100       | yes                                 | 3                               | 4.2                         |
| Weiner       | 2011                | USA                                                                                                                                             | smokers with schizophrenia and schizoaffective disorder                                                        | 100       | no                                  | NA                              | NA                          |
| Williams     | 2007                | USA, Australia                                                                                                                                  | smokers from the general population                                                                            | 100       | yes                                 | 10                              | 15.1                        |
| Williams     | 2012                | USA, Canada                                                                                                                                     | smokers with                                                                                                   | 100       | yes                                 | 7.2                             | 7                           |

| <b>First author</b> | <b>Year of publication</b> | <b>Location</b> | <b>Population</b>                                                                                                    | <b>% smokers</b> | <b>Sponsored by pharmaceutical company</b> | <b>Loss to follow up varenicline %</b> | <b>Loss to follow up placebo %</b> |
|---------------------|----------------------------|-----------------|----------------------------------------------------------------------------------------------------------------------|------------------|--------------------------------------------|----------------------------------------|------------------------------------|
| Wong                | 2012                       | Canada          | schizophrenia/schizoaffective disorder<br>smokers from preoperative clinics who will undergo surgery in 8 to 30 days | 100              | no                                         | 4.6                                    | 4.4                                |
| Zesiewicz           | 2012                       | USA             | people with spinocerebellar ataxia 3                                                                                 | 0                | no                                         | 0                                      | 10                                 |
| Zhao                | 2011                       | USA             | healthy, elderly non smokers                                                                                         | 0                | yes                                        | NA                                     | NA                                 |
