# Supplementary material
Source: PubMed Central journal article supplement (PMC4794012)
Supplement: thok023212.ww5_default.pdf [file thok023212.ww5_default.pdf]

Appendix 5

Funnel plots [posted as supplied by author]

Depression

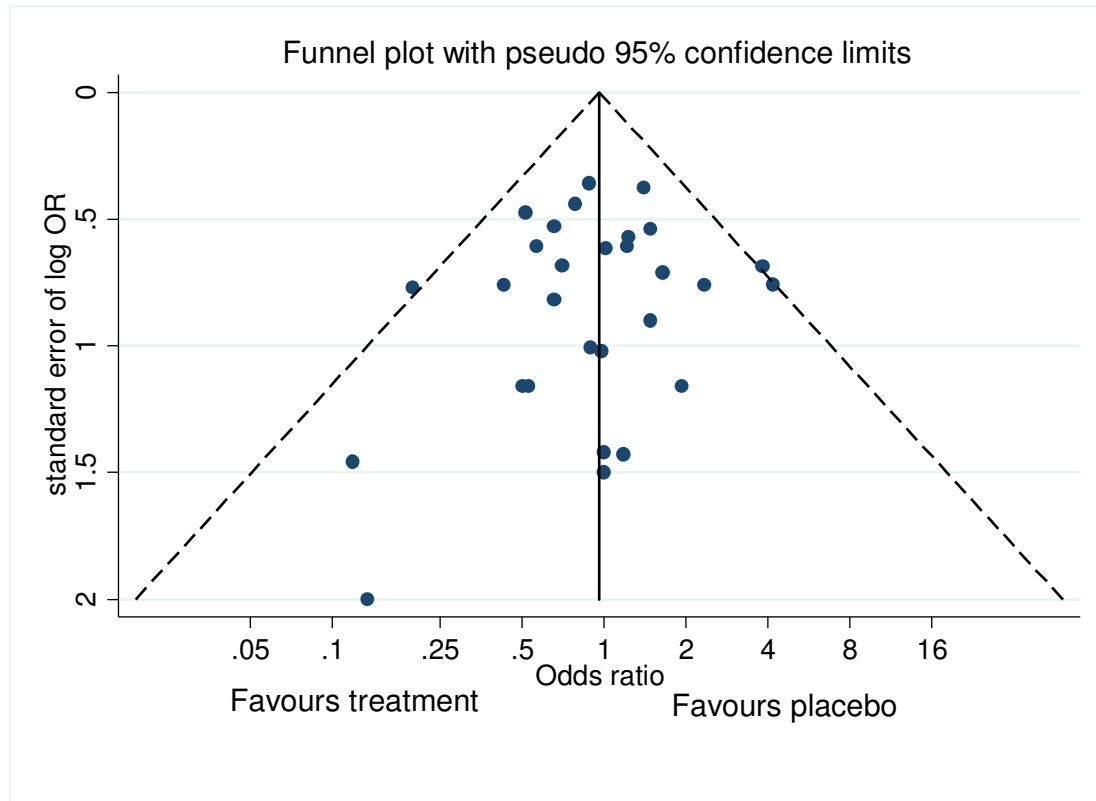

Harbord's modified test for small-study effects:

Test of null hypothesis (no small-study effects) P = 0.531

Insomnia

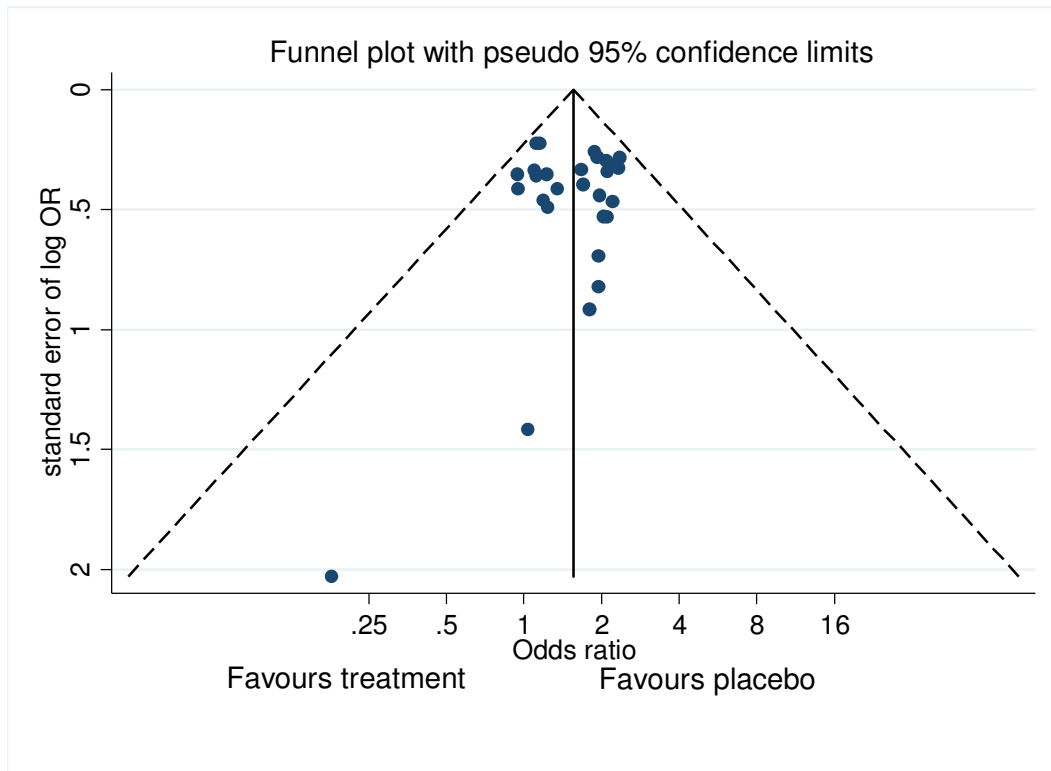

Harbord's modified test for small-study effects:

Test of null hypothesis (no small-study effects) P = 0.927
