# Supplementary material
Source: PubMed Central journal article supplement (PMC4794012)
Supplement: thok023212.ww6_default.pdf [file thok023212.ww6_default.pdf]

Appendix 6 Summary of Peto odds ratios, risk differences and 95% confidence intervals for neuropsychiatric events (all doses of varenicline combined vs placebo) [posted as supplied by author]

| Neuropsychiatric adverse event | Varenicline group<br>number of events/<br>number treated | Placebo group<br>number of events/<br>number treated | Peto odds ratio and 95% confidence interval | p value           | Risk difference and 95% confidence interval | p value           |
|--------------------------------|----------------------------------------------------------|------------------------------------------------------|---------------------------------------------|-------------------|---------------------------------------------|-------------------|
| <b>Primary outcomes</b>        |                                                          |                                                      |                                             |                   |                                             |                   |
| Depression                     | 175/5875                                                 | 139/4487                                             | 0.97(0.76 to 1.23)                          | 0.78              | -0.001 (-0.008 to 0.006)                    | 0.79              |
| Suicidal ideation              | 15/2799                                                  | 18/2191                                              | 0.58 (0.28 to 1.20)                         | 0.14              | -0.003 (-0.009 to 0.002)                    | 0.24              |
| Suicide attempt                | 2/2437                                                   | 2/1842                                               | 0.63 (0.08 to 5.12)                         | 0.67              | -0.0004 (-0.005 to 0.004)                   | 0.87              |
| Suicide and suicide attempt    | 4/6173                                                   | 2/4478                                               | 1.56 (0.29 to 8.28)                         | 0.6               | 0.0003 (-0.002 to 0.003)                    | 0.85              |
| <b>Secondary outcomes</b>      |                                                          |                                                      |                                             |                   |                                             |                   |
| Abnormal dreams                | 660/6157                                                 | 235/4773                                             | <b>2.22 (1.91 to 2.58)</b>                  | <b>&lt;0.0001</b> | <b>0.05 (0.04 to 0.06)</b>                  | <b>&lt;0.0001</b> |
| Aggression                     | 39/4290                                                  | 24/3524                                              | 0.90 (0.52 to 1.57)                         | 0.72              | -0.001 (-0.005 to 0.004)                    | 0.76              |
| Anxiety                        | 246/6016                                                 | 232/4650                                             | <b>0.76 (0.63 to 0.93)</b>                  | <b>0.009</b>      | <b>-0.01 (-0.02 to -0.002)</b>              | <b>0.01</b>       |
| Death                          | 13/6595                                                  | 11/4887                                              | 1.01 (0.45 to 2.29)                         | 0.98              | 0.00002 (-0.003 to 0.003)                   | 0.99              |
| Fatigue                        | 327/6361                                                 | 212/4733                                             | <b>1.28 (1.06 to 1.54)</b>                  | <b>0.01</b>       | <b>0.01 (0.003 to 0.02)</b>                 | <b>0.01</b>       |
| Insomnia                       | 787/6466                                                 | 390/4794                                             | <b>1.52 (1.33 to 1.73)</b>                  | <b>&lt;0.0001</b> | <b>0.04 (0.02 to 0.05)</b>                  | <b>&lt;0.0001</b> |
| Irritability                   | 340/6233                                                 | 266/4615                                             | 0.97 (0.81 to 1.16)                         | 0.72              | -0.002 (-0.01 to 0.007)                     | 0.72              |
| Sleep disorders                | 225/5894                                                 | 123/4284                                             | <b>1.58 (1.25 to 2.01)</b>                  | <b>&lt;0.0001</b> | <b>0.01 (0.01 to 0.02)</b>                  | <b>&lt;0.0001</b> |
| Somnolence                     | 184/6227                                                 | 101/4574                                             | 1.24 (0.96 to 1.61)                         | 0.09              | 0.005 (-0.001 to 0.011)                     | 0.09              |

Notes for Appendix 6

This secondary analysis was done in response to reviewers' comments on the original submitted manuscript. It is not part of the original PROSPERO protocol.

For the analysis of varenicline (all doses) vs placebo, the studies by Hong et al. (2011) and Mocking et al. (2013) cited in the discussion but originally excluded from the systematic review as they included 0.5 mg varenicline would now meet the inclusion criteria. The Mocking et al. (2013) study could not be included in the meta-analyses as the numbers of adverse events or deaths were not reported.

Original analysis after exclusion of 5 trials (39 trials) discussed in the main manuscript- n= 5817 varenicline, n=4944 placebo

Secondary analysis (40 trials-i.e. 39 trials as above plus the Hong et al. (2011) trial (0.5 mg varenicline) with all doses of varenicline included in the following trials- Burstein et al. (2006), Faessel et al. (2009)- since this study included adolescents and varenicline is only recommended for use in adults only, the doses in the high body weight adolescents were used, Nakamura et al. (2007), Nides et al. (2006) and Oncken et al. (2006)- n=6684 varenicline, n=4976 placebo.
